# Supplementary material for: Intrinsic mechanical properties of the polymeric semiconductors
Source: Royal Society of Chemistry journal article supplement (doi:10.1039/d0tc02255a), 2020-01-01
Supplement: d0tc02255a1.pdf [file d0tc02255a1.pdf]

## Supporting Information

### Intrinsically mechanical properties of polymeric semiconductor

Xiang An,<sup>a</sup> Kai Wang<sup>a</sup>, Lubing Bai,<sup>a</sup> Chuanxin Wei,<sup>a</sup> Man Xu,<sup>b</sup> Mengna Yu,<sup>b</sup> Yamin Han,<sup>a</sup> Ning Sun,<sup>a</sup> Lili Sun,<sup>a</sup> Jinyi Lin,<sup>\*a</sup> Xuehua Ding,<sup>a</sup> Linghai Xie,<sup>b</sup> Qi Zhang<sup>b</sup>, Tianshi Qin,<sup>a</sup> and Wei Huang<sup>\*ac</sup>

<sup>a</sup>Key Laboratory of Flexible Electronics (KLOFE) & Institute of Advanced Materials (IAM), Nanjing Tech University (NanjingTech), 30 South Puzhu Road, Nanjing 211816, China.

<sup>b</sup>Center for Molecular Systems and Organic Devices (CMSOD), Key Laboratory for Organic Electronics and Information Displays & Institute of Advanced Materials (IAM), Nanjing University of Posts & Telecommunications, 9 Wenyuan Road, Nanjing 210023, China.

<sup>c</sup> Frontiers Science Center for Flexible Electronics, Xi'an Institute of Flexible Electronics (IFE) and Xi'an Institute of Biomedical Materials & Engineering, Northwestern Polytechnical University, 127 West Youyi Road, Xi'an 710072, China

\*To whom corresponding should be addressed. E-mail: [wei-huang@njtech.edu.cn](mailto:wei-huang@njtech.edu.cn),  
[iamwhuang@njupt.edu.cn](mailto:iamwhuang@njupt.edu.cn) (Wei Huang), [iamjylin@njtech.edu.cn](mailto:iamjylin@njtech.edu.cn) (Jinyi Lin)

**Table S1. The Young's modulus and hardness of six polymers.**

| Sample  | Constant Displacement Rate <sup>a</sup> |             |                             |             |                             |             | Constant Load Rate <sup>b</sup> |             |
|---------|-----------------------------------------|-------------|-----------------------------|-------------|-----------------------------|-------------|---------------------------------|-------------|
|         | $h_{\max} = 60 \text{ nm}$              |             | $h_{\max} = 120 \text{ nm}$ |             | $h_{\max} = 180 \text{ nm}$ |             | $E_r$ (GPa)                     | $H$ (GPa)   |
|         | $E_r$ (GPa)                             | $H$ (GPa)   | $E_r$ (GPa)                 | $H$ (GPa)   | $E_r$ (GPa)                 | $H$ (GPa)   |                                 |             |
| PFO     | 20.57 ± 1.25                            | 1.36 ± 0.13 | 25.06 ± 0.20                | 1.79 ± 0.03 | 23.32 ± 0.21                | 1.68 ± 0.03 | 22.48 ± 0.34                    | 1.48 ± 0.07 |
| F8BT    | 22.34 ± 1.46                            | 1.82 ± 0.06 | 23.79 ± 0.38                | 1.87 ± 0.10 | 24.92 ± 0.28                | 1.92 ± 0.01 | 22.65 ± 0.53                    | 1.70 ± 0.03 |
| PVK     | 3.01 ± 0.17                             | 0.20 ± 0.02 | 2.44 ± 0.05                 | 0.17 ± 0.01 | 13.48 ± 0.72                | 0.46 ± 0.01 | 2.82 ± 0.32                     | 0.07 ± 0.01 |
| P3HT    | 16.51 ± 2.54                            | 0.71 ± 0.27 | 18.13 ± 1.86                | 0.78 ± 0.17 | 18.65 ± 0.42                | 0.82 ± 0.03 | 15.01 ± 1.38                    | 0.57 ± 0.15 |
| PTB7-Th | 3.06 ± 0.18                             | 0.11 ± 0.01 | 3.45 ± 0.11                 | 0.07 ± 0.01 | 6.84 ± 0.22                 | 0.09 ± 0.01 | 3.93 ± 0.27                     | 0.14 ± 0.01 |
| MEH-PPV | 12.96 ± 1.48                            | 0.38 ± 0.04 | 13.91 ± 0.54                | 0.50 ± 0.02 | 20.90 ± 0.97                | 0.58 ± 0.06 | 15.59 ± 0.78                    | 0.43 ± 0.01 |

<sup>a</sup>The loading time is 5 s. <sup>b</sup>The loading time is 5 s and  $P_{\max}$  is set according to the result at constant displacement rate. The load rate operated on PFO, F8BT, PVK, P3HT, PTB7-Th and MEH-PPV was 24  $\mu\text{N/s}$ , 32  $\mu\text{N/s}$ , 2.4  $\mu\text{N/s}$ , 12  $\mu\text{N/s}$ , 4  $\mu\text{N/s}$  and 14  $\mu\text{N/s}$  respectively.

**Table S2. The mechanical parameters of six polymers obtained from three-parameter models.**

| Samples | $P_0$ ( $\mu\text{N}$ ) | $P_1$ ( $\mu\text{N}$ ) | $\tau$ (s)  | $D_0$ (nm)   | $D_1'$ (nm)  | $\tau'$ (s) | $P_1:P_0$ | $D_1':D_0$ |
|---------|-------------------------|-------------------------|-------------|--------------|--------------|-------------|-----------|------------|
| PFO     | 51.29 ± 2.00            | 90.15 ± 2.11            | 3.56 ± 0.20 | 4.30 ± 0.04  | 27.50 ± 0.02 | 1.20 ± 0.03 | 1.76:1    | 6.40:1     |
| F8BT    | 26.84 ± 0.57            | 140.05 ± 0.65           | 2.13 ± 0.09 | 3.88 ± 0.99  | 40.90 ± 0.02 | 1.51 ± 0.07 | 5.22:1    | 10.54:1    |
| PVK     | 4.64 ± 0.03             | 18.12 ± 0.04            | 0.93 ± 0.02 | 2.79 ± 0.15  | 10.06 ± 0.02 | 1.79 ± 0.18 | 3.91:1    | 3.61:1     |
| P3HT    | 17.17 ± 0.06            | 33.02 ± 0.08            | 0.99 ± 0.01 | 5.41 ± 0.04  | 11.80 ± 0.02 | 1.17 ± 0.02 | 1.92:1    | 2.18:1     |
| PTB7-Th | 5.77 ± 0.03             | 11.89 ± 0.03            | 0.87 ± 0.01 | 15.05 ± 0.11 | 14.14 ± 0.02 | 1.68 ± 0.02 | 2.06:1    | 0.94:1     |
| MEH-PPV | 41.63 ± 0.11            | 39.73 ± 0.18            | 1.00 ± 0.11 | 13.62 ± 0.10 | 10.83 ± 0.02 | 1.67 ± 0.02 | 0.95:1    | 0.80:1     |

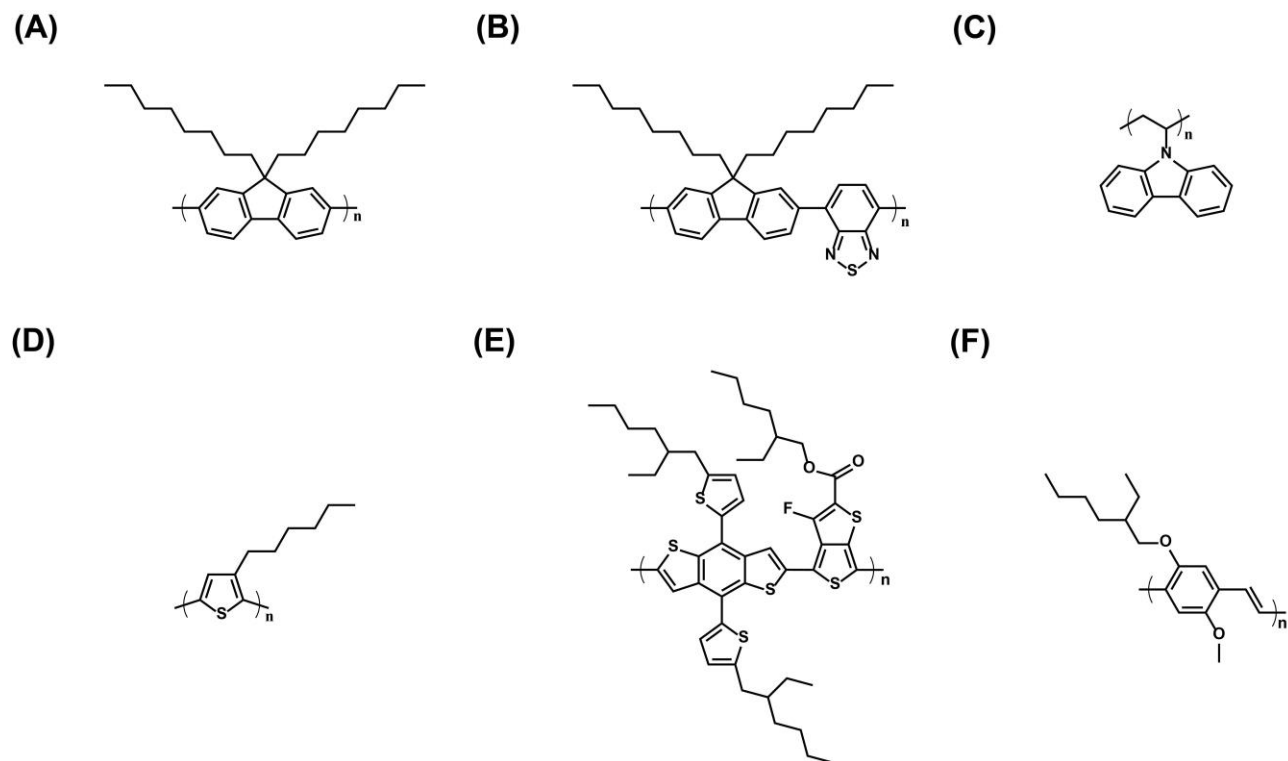

**Figure S1.** The chemical structure of (A) PFO, (B) F8BT, (C) PVK, (D) P3HT, (E) PTB7-Th and (F) MEH-PPV.

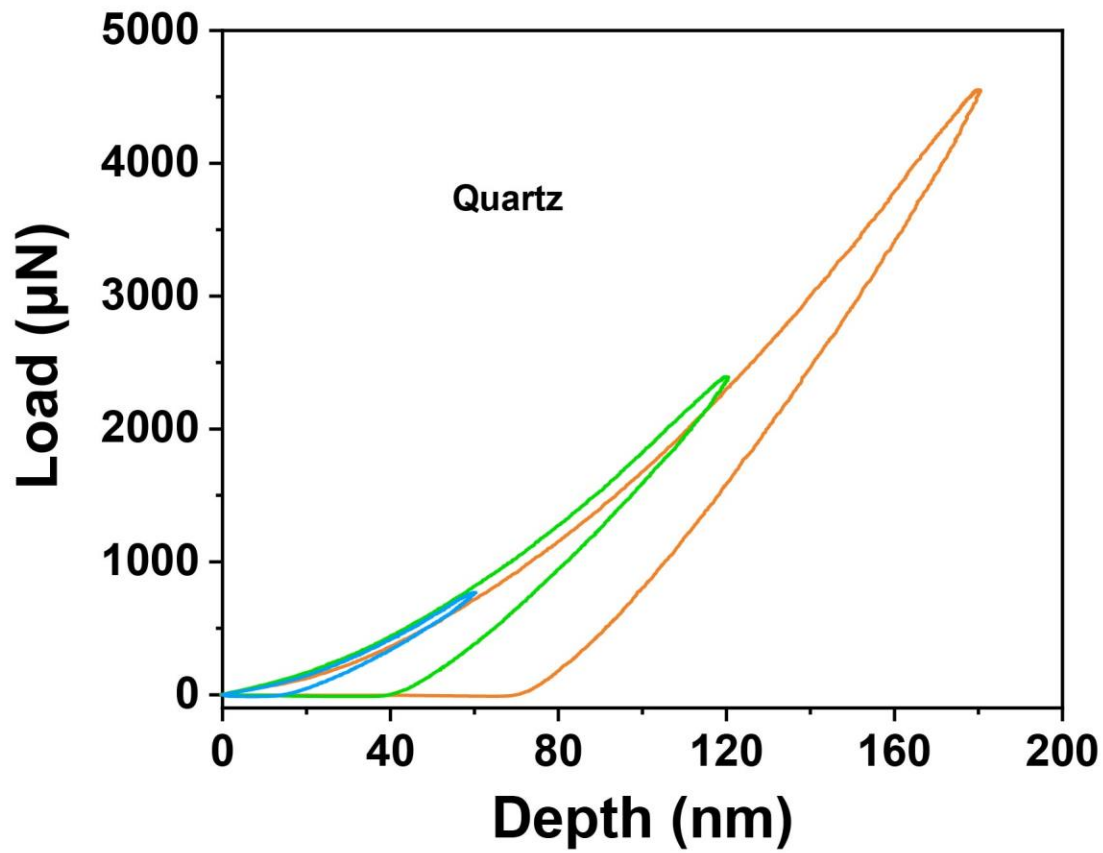

**Figure S2.** The nano-indentation test curves of quartz substrate at constant displacement rate mode. ( $E_r = 76.07 \pm 5.00$  GPa and  $H = 11.18 \pm 0.84$  GPa.) The blue, green and orange curve represents  $h_{\max} = 60$  nm, 120 nm and 180 nm, respectively.

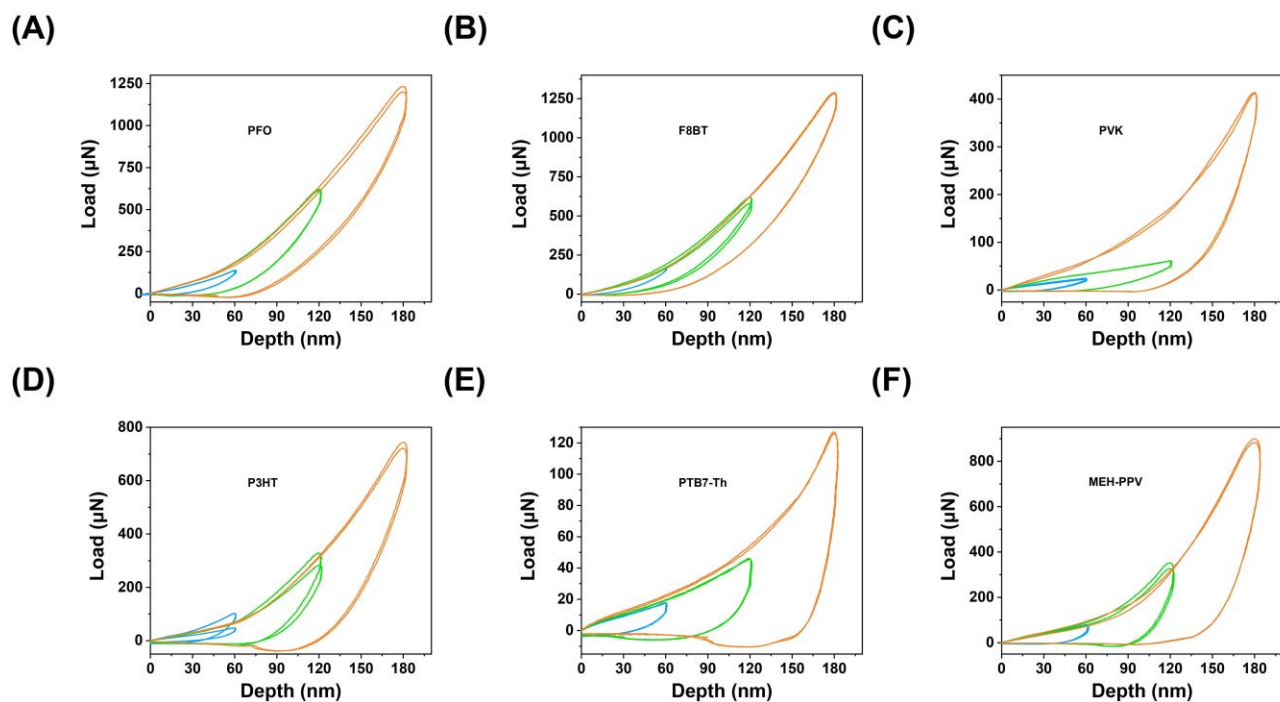

**Figure S3.** The nano-indentation test curves of (A) PFO, (B) F8BT, (C) PVK, (D) P3HT, (E) PTB7-Th and (F) MEH-PPV at constant displacement rate mode. The blue, green and orange curves represent  $h_{\max} = 60$  nm, 120 nm and 180 nm, respectively.

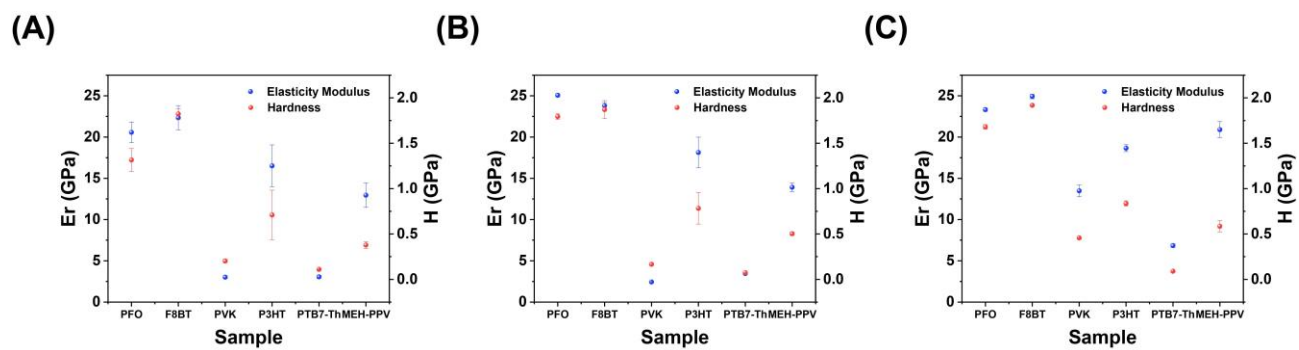

**Figure S4.** The  $E_r$  and  $H$  of six polymers at  $h_{\max} =$  (A) 60 nm, (B) 120 nm and (C) 180 nm.
